# Supplementary material for: Temporal trends in the incidence of haemophagocytic lymphohistiocytosis: a nationwide cohort study from England 2003-2018
Source: bioRxiv or medRxiv preprint supplement (doi:10.1101/2022.03.30.22273090), 2022-04-06

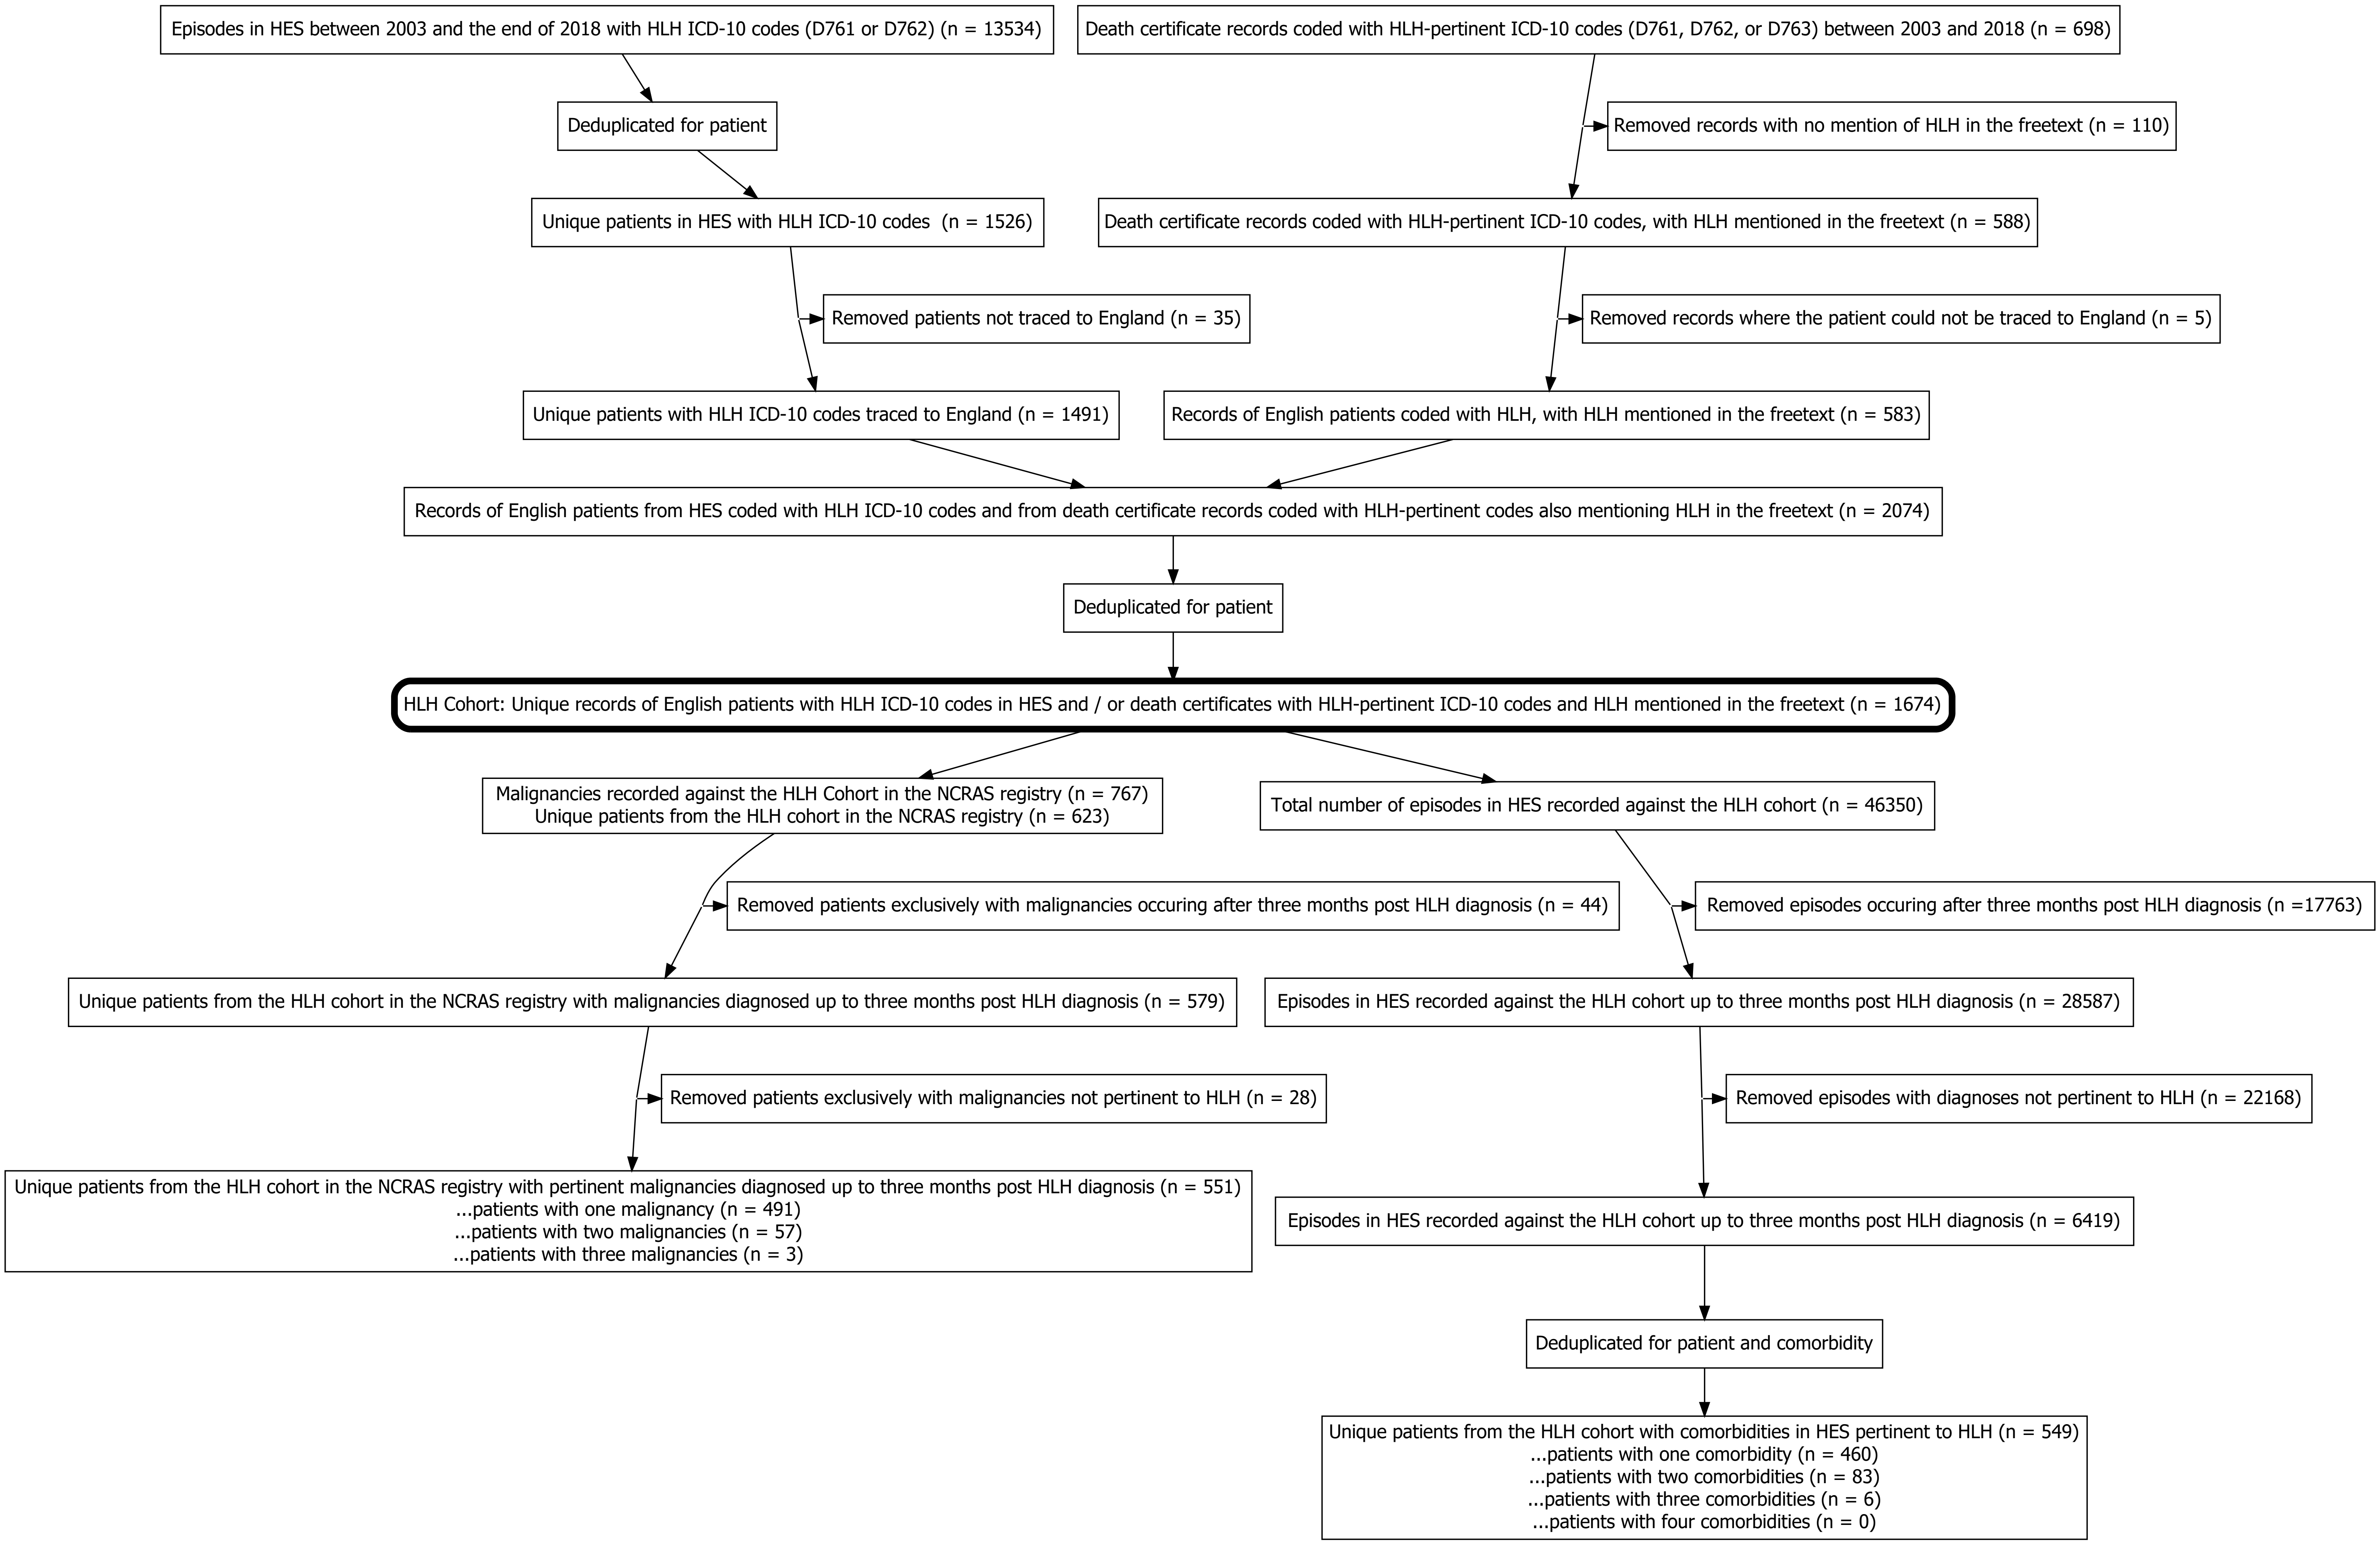

Supplement: Supplementary file [file media-1.pdf]
